# Supplementary material for: Physical Activity and Incident Heart Failure in High‐Risk Subgroups: The ARIC Study
Source: PubMed Central journal article supplement — J Am Heart Assoc. 2020 May 11;9(10):e014885. doi: 10.1161/JAHA.119.014885 (PMC7660876; doi:10.1161/jaha.119.014885), 2020-05-11
Supplement: JAH3-9-e014885-s001.pdf [file JAH3-9-e014885-s001.pdf]

# **Supplemental Material**

**Table S1. Adjusted Hazard Ratios and 95% CI for Incident Heart Failure Associated with Higher Category of Physical Activity, Overall, Among Participants with or Without ASCVD, Excluding Heart Failure Events in The First 2 Years of Follow Up†**

|                                 | Physical activity category |                     |                     | p for interaction |
|---------------------------------|----------------------------|---------------------|---------------------|-------------------|
|                                 | Poor                       | Intermediate        | Recommended         |                   |
| <b>Overall<br/>(n=13,736)</b>   | Reference<br>(1)           | 0.87<br>(0.79-0.95) | 0.78<br>(0.71-0.85) |                   |
| <b>No ASCVD*<br/>(n=12,513)</b> | Reference<br>(1)           | 0.87<br>(0.79-0.97) | 0.74<br>(0.67-0.82) | 0.01              |
| <b>ASCVD*<br/>(n=1,223)</b>     | Reference<br>(1)           | 0.82<br>(0.63-1.06) | 0.94<br>(0.76-1.17) |                   |

\* ASCVD = atherosclerotic cardiovascular disease

† Adjusted for age, sex, race, smoking status, and alcohol intake

**Table S2. Characteristics of the Study Population at Visit 1 (1987-1989) by ASCVD Status and Physical Activity Category.**

|                               | No ASCVD     |              |              | ASCVD        |              |              |
|-------------------------------|--------------|--------------|--------------|--------------|--------------|--------------|
|                               | Poor         | Intermediate | Recommended  | Poor         | Intermediate | Recommended  |
| <b>Number</b>                 | 4618 (36.8%) | 3121 (24.8%) | 4820 (38.4%) | 466 (37.2%)  | 290 (23.2%)  | 495 (39.6%)  |
| <b>Age, years</b>             | 54.2 (5.6)   | 54.2 (5.7)   | 54.6 (5.8)   | 56.6 (5.8)   | 56.0 (5.5)   | 57.2 (5.6)   |
| <b>Black</b>                  | 1824 (39.5%) | 684 (21.9%)  | 725 (15.0%)  | 191 (41.0%)  | 66 (22.8%)   | 81 (16.4%)   |
| <b>Female</b>                 | 2697 (58.4%) | 1858 (59.5%) | 2385 (49.5%) | 234 (50.2%)  | 143 (49.3%)  | 174 (35.2%)  |
| <b>BMI, kg/m<sup>2</sup></b>  | 28.5 (5.6)   | 27.4 (5.1)   | 26.7 (4.3)   | 28.6 (6.0)   | 28.0 (5.0)   | 27.5 (4.8)   |
| <b>Smoking Status</b>         |              |              |              |              |              |              |
| <b>Never Smoker</b>           | 1934 (41.9%) | 1431 (45.9%) | 2092 (43.4%) | 141 (30.3%)  | 79 (27.2%)   | 140 (28.3%)  |
| <b>Former Smoker</b>          | 1265 (27.4%) | 955 (30.6%)  | 1790 (37.2%) | 126 (27.1%)  | 119 (41.0%)  | 238 (48.1%)  |
| <b>Current Smoker</b>         | 1415 (30.7%) | 734 (23.5%)  | 936 (19.4%)  | 198 (42.6%)  | 92 (31.7%)   | 117 (23.6%)  |
| <b>Alcohol Intake, g/week</b> | 40.9 (106.1) | 38.8 (85.5)  | 45.8 (86.1)  | 47.8 (119.8) | 47.9 (106.0) | 37.4 (76.7)  |
| <b>Diabetes</b>               | 596 (12.9%)  | 307 (9.8%)   | 390 (8.1%)   | 120 (25.8%)  | 42 (14.5%)   | 82 (16.6%)   |
| <b>Anti-Hypertensive</b>      | 1347 (29.2%) | 752 (24.1%)  | 1015 (21.1%) | 241 (51.7%)  | 141 (48.6%)  | 275 (55.6%)  |
| <b>SBP, mmHg</b>              | 123.0 (19.4) | 119.8 (17.8) | 118.9 (17.3) | 127.7 (23.2) | 122.0 (20.0) | 122.3 (19.4) |
| <b>HDL-c, mg/dl</b>           | 51.6 (17.1)  | 52.1 (16.4)  | 52.7 (17.3)  | 47.5 (16.5)  | 48.8 (16.9)  | 45.5 (15.7)  |
| <b>LDL-c, mg/dl</b>           | 137.3 (39.7) | 136.9 (38.6) | 136.0 (37.9) | 149.3 (41.8) | 147.2 (39.7) | 147.4 (40.3) |

|                                                   |              |              |              |              |              |              |
|---------------------------------------------------|--------------|--------------|--------------|--------------|--------------|--------------|
| <b>Triglycerides, mg/dl (IQR)</b>                 | 110 [79-155] | 108 [78-152] | 105 [75-151] | 128 [87-184] | 125 [91-184] | 129 [92-182] |
| <b>eGFR, ml/min/1.73<sup>2</sup>(median, IQR)</b> | 106 [97-115] | 103 [95-111] | 102 [94-109] | 102 [90-113] | 99 [92-108]  | 99 [89-107]  |
| <b>Elevated hs-cTnT (≥ 14 ng/L)</b>               | 201 (5.2%)   | 93 (3.4%)    | 139 (3.3%)   | 49 (13.7%)   | 27 (11.2%)   | 61 (14.7%)   |
| <b>Elevated NT-proBNP (≥ 100 pg/ml)</b>           | 841 (21.6%)  | 604 (22.0%)  | 818 (19.4%)  | 144 (40.0%)  | 110 (45.6%)  | 200 (48.0%)  |

\* ASCVD = atherosclerotic cardiovascular disease; BMI = body mass index; SBP = systolic blood pressure; HDL-c = HDL cholesterol; LDL-c = LDL cholesterol; eGFR = estimated glomerular filtration rate; IQR = interquartile range; hs-cTnT = high sensitivity cardiac Troponin T; NT-proBNP = N-Terminal pro Brain Natriuretic Peptide

† Values are means and standard deviations, or number and proportion, except where indicated

**Table S3. Adjusted Hazard Ratios and 95% CI for Incident Heart Failure Associated with Higher Category of Physical Activity Among Participants with and Without CHD at Visit 1.**

|                                     | Physical activity category |                     |                     | p for interaction |
|-------------------------------------|----------------------------|---------------------|---------------------|-------------------|
|                                     | Poor                       | Intermediate        | Recommended         |                   |
| <b>No CHD*</b><br><b>(n=13,220)</b> | Reference<br>(1)           | 0.85<br>(0.77-0.94) | 0.75<br>(0.68-0.82) | 0.24              |
| <b>CHD*</b><br><b>(n=590)</b>       | Reference<br>(1)           | 0.86<br>(0.62-1.20) | 0.91<br>(0.69-1.20) |                   |

\* CHD = coronary heart disease

† Adjusted for age, sex, race, smoking status, and alcohol intake

**Table S4. Adjusted Hazard Ratios and 95% CI for Incident Heart Failure Associated with Cross-Categories of Physical Activity at Visit 1 and Visit 3<sup>†</sup>**

|                               | Cross-category of physical activity |                     |                         | p for interaction |
|-------------------------------|-------------------------------------|---------------------|-------------------------|-------------------|
|                               | Poor-Poor                           | Other <sup>‡</sup>  | Recommended-Recommended |                   |
| <b>No CHD*<br/>(n=10,572)</b> | Reference<br>(1)                    | 0.81<br>(0.72-0.91) | 0.69<br>(0.60-0.79)     | 0.95              |
| <b>CHD*<br/>(n=673)</b>       | Reference<br>(1)                    | 0.86<br>(0.64-1.17) | 0.75<br>(0.53-1.06)     |                   |

\* CHD = coronary heart disease

† Adjusted for age, sex, race, smoking status, and alcohol intake at Visit 1 and Visit 3

‡ Other longitudinal physical activity patterns from Visit 1 to Visit 3: poor-intermediate, poor-recommended, intermediate-poor, intermediate-intermediate, intermediate-recommended, recommended-poor, and recommended-intermediate.

Figure S1. A. Continuous Association of Increasing Levels of PA with Incident HF, Among Participants Without ASCVD at Visit 1.

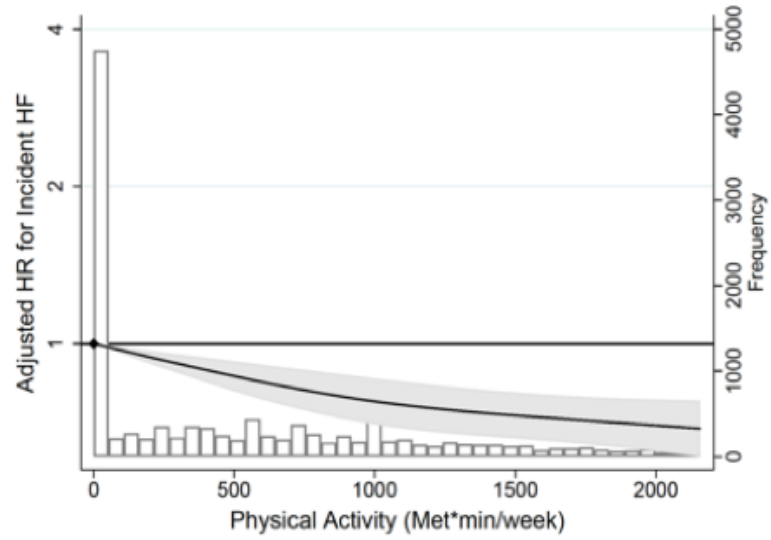

Figure S1B. Continuous Association of Increasing Levels of PA with Incident HF, Among Participants with ASCVD at Visit 1.

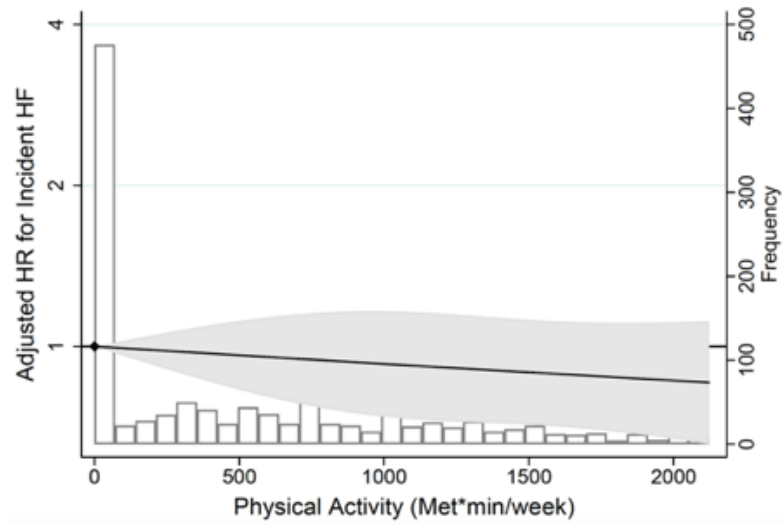

\* Adjusted for age, sex, race, smoking status, and alcohol intake
